# Supplementary material for: Oil-gated isoporous membrane with micro-apertures for controllable pressure-induced passive flow regulator
Source: Royal Society of Chemistry journal article supplement (doi:10.1039/d3ra03017b), 2023-01-01
Supplement: d3ra03017b1.pdf [file d3ra03017b1.pdf]

# Oil-gated Isoporous Membrane with Micro-apertures for Controllable Pressure-induced Passive Flow Regulator

*Yujin Park<sup>1</sup>, Joondong Kim<sup>2</sup>, Ju-Hyung Yun<sup>2</sup>, Segeun Jang<sup>3,\*</sup> and Sang Moon Kim<sup>1,\*</sup>*

<sup>1</sup> *Department of Mechanical Engineering, Incheon National University, Incheon, 22012, Republic of Korea*

<sup>2</sup> *Department of Electrical Engineering, Incheon National University, Incheon, 22012, Republic of Korea*

<sup>3</sup> *School of Mechanical Engineering, Kookmin University, Seoul 02707, Republic of Korea*

\* Corresponding authors: ksm7852@inu.ac.kr (S. M. Kim), sjang@kookmin.ac.kr (S. Jang)

**Keywords:** Controllable liquid flow rate, Oil-gating, Uniform micro-apertures, polymer membrane, Pressure-dependent gating gas valve

**Table S1.** Comparison of flow stabilization systems.

| <b>System type</b>                 | <b>Operation mechanism</b>                                                  | <b>Advantage</b>                                                     | <b>Limitation</b>                                                                            | <b>Ref.</b> |
|------------------------------------|-----------------------------------------------------------------------------|----------------------------------------------------------------------|----------------------------------------------------------------------------------------------|-------------|
| PID flow controllers               | PID based electrically control                                              | Quick response time and high accuracy                                | Expensive and complex systems, non-space effective                                           | S1,S2       |
| Spring based safety valves         | Spring force-based valve opening /closing control                           | Self-actuating and cost-effective                                    | Limited shapes, sizes, and pressure ranges, non-space effective                              | S3,S4       |
| Deformable soft and flexible valve | Pressure induced soft material deformation to adjust the fluidic resistance | Passively-actuating, simple, light, thin and space-efficient         | Relatively high pressure, non-linearity between pressure and deformation, and clogging issue | S5-S10      |
| This study                         | Oil-gating pressure control                                                 | Precise control via linearity, adjustability and passively-actuating | Relatively low operating pressure and pressure-oscillating issue                             | -           |

## References

- S1. W. Zeng, S. Li and Z. Wang, 2015.
- S2. W. Zeng and H. Fu, Chemical Engineering Research and Design, 2020, 160, 321-325.
- S3. A. Singh, Nuclear Engineering and Design, 1982, 72, 197-204.
- S4. R. Wang, X. Xiang, C. Zong, F. Zheng and X. Song, 2019.
- S5. I. Doh and Y.-H. Cho, Lab on a Chip, 2009, 9, 2070-2075.
- S6. X. Zhang, K. Xia and A. Ji, Sensors and Actuators B: Chemical, 2020, 304, 127331.
- S7. B. Yang and Q. Lin, Journal of microelectromechanical systems, 2007, 16, 411-419.
- S8. E. P. Kartalov, C. Walker, C. R. Taylor, W. F. Anderson and A. Scherer, Proceedings of the National academy of Sciences, 2006, 103, 12280-12284.
- S9. X. Zhang, A. E. Oseyemi, K. Ma and S. Yu, Sensors and Actuators B: Chemical, 2022, 367, 132035.
- S10. Chappel, Applied Sciences, 2020, 10, 8858.

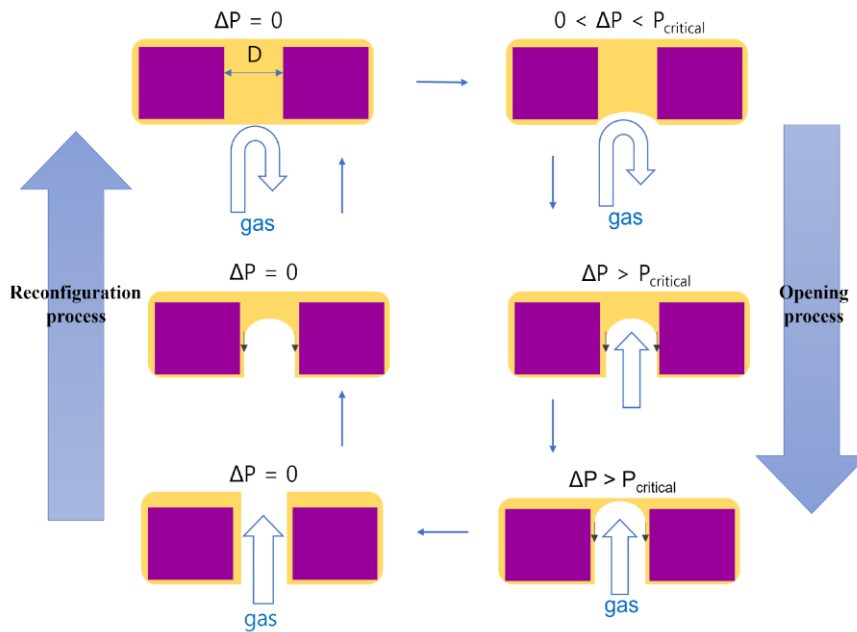

**Figure S1.** Schematic illustration of opening and closing(reconfiguration) behaviour of the oil-gated apertures depending on the applied pressure.

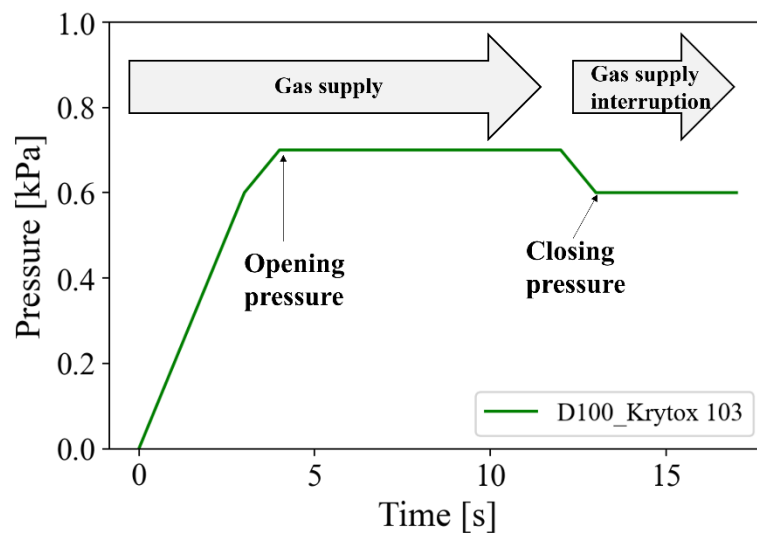

**Figure S2.** The measurement of the hysteresis between the opening pressure and the closing pressure of the OGIM.

**Table S2.** The opening pressure and the closing pressure of the OGIM.

|      | Opening pressure [kPa] | Closing pressure [kPa] | Hysteresis [kPa] |
|------|------------------------|------------------------|------------------|
| D100 | 0.7                    | 0.63±0.05              | 0.05±0.05        |
| D50  | 1.35±0.05              | 1.05±0.07              | 0.29±0.05        |
| D40  | 1.55±0.05              | 1.33±0.047             | 0.18±0.06        |
| D20  | 3.47±0.047             | 2.8±0.082              | 0.62±0.09        |

**Table S3.** Summarized kinematic viscosity of Krytox 103 and silicone oil 1000 cst from supplier data sheet.

| Temperature                                  | kinematic viscosity<br>- Krytox 103 | kinematic viscosity<br>- Silicone oil |
|----------------------------------------------|-------------------------------------|---------------------------------------|
| 20°C                                         | 82 mm <sup>2</sup> /s               | 1000 mm <sup>2</sup> /s               |
| 40°C for Krytox 103<br>50°C for silicone oil | 30 mm <sup>2</sup> /s               | 600 mm <sup>2</sup> /s                |
| 100°C                                        | 5 mm <sup>2</sup> /s                | 30 mm <sup>2</sup> /s                 |

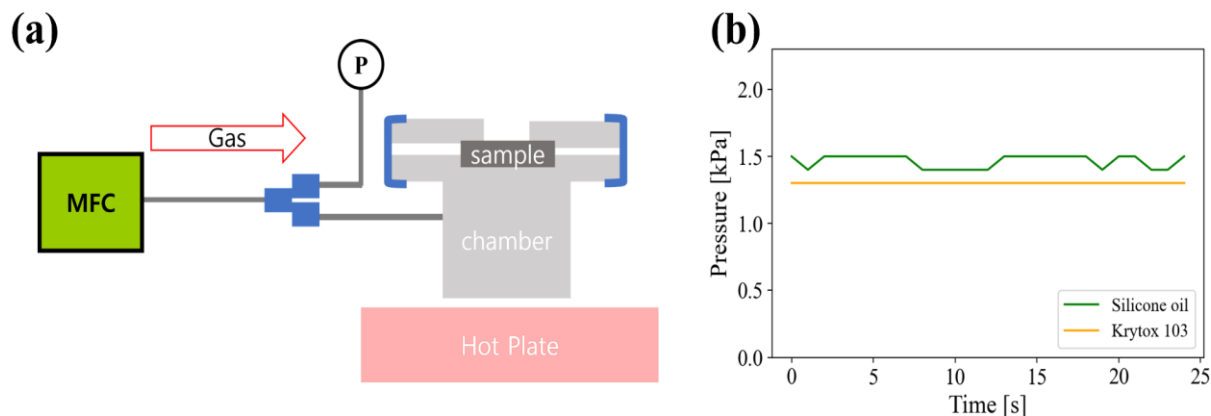

**Figure S3.** (a) Schematic illustration of the experimental set-up to investigate the impact of temperature on the pressure oscillating behavior of OGIMs (b) Measured internal pressure using the OGIM with the aperture diameter of 50  $\mu\text{m}$  at 50°C. The green line represents the OGIM with silicone oil as a gating oil, while orange line represents the OGIM with Krytox 103 as a gating oil.

**Table S4.** Measured internal pressure using the OGIM with the aperture diameter of 50  $\mu\text{m}$  by varying the temperature and the gating oil.

| Temperature | Measured critical pressure<br>- Krytox 103 | Measured critical pressure<br>- Silicone oil |
|-------------|--------------------------------------------|----------------------------------------------|
| 25°C        | 1.35 kPa                                   | 0.5 kPa to 1.6 kPa                           |
| 50°C        | 1.3 kPa                                    | 1.4 to 1.5 kPa                               |

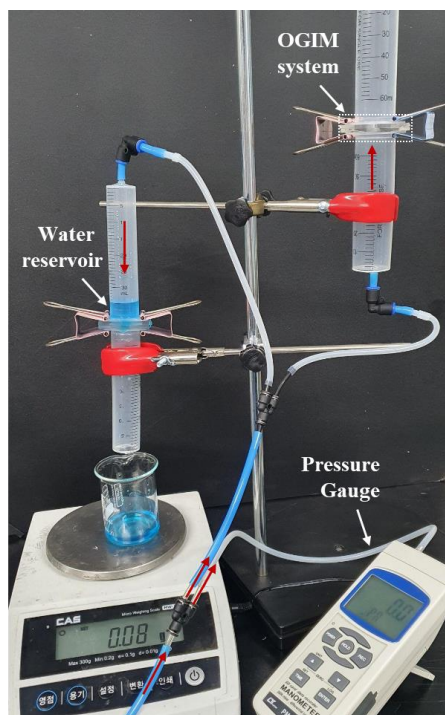

**Figure S4.** Camera image of experimental set-up for controllable pressure-induced passive flow regulator

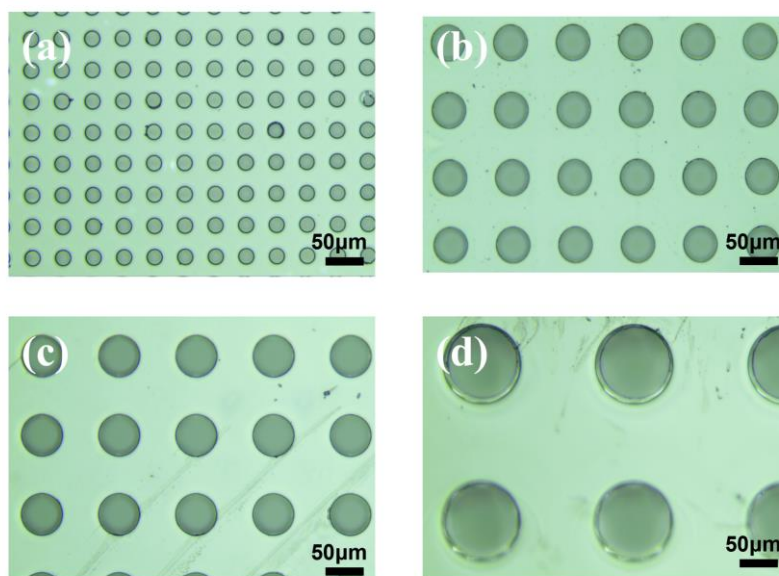

**Figure S5.** The OM images of PUA membranes with a diameter of (a) 20 μm (D20) (b) 40 μm (D40) (c) 50 μm (D50) (d) 100 μm (D100).

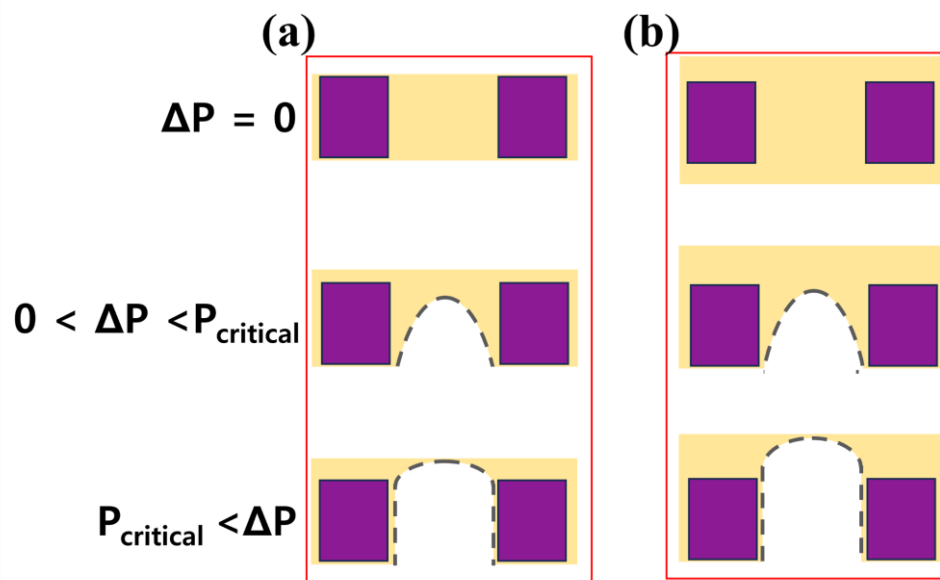

**Figure S6.** Schematic illustration of the opening behaviour of the OGIM dispensed with a variation of loading amounts of gating oil. (a) OGIM dispensed without excessive gating oil. (b) OGIM dispensed with excessive gating oil.

**Table S5.** Measured water flow rate and pressure for stencil membranes with different aperture size.

| Sample                 | D20               | D40               | D50               | D100              |
|------------------------|-------------------|-------------------|-------------------|-------------------|
| Pressure [kPa]         | $3.9 \pm 0.2$     | $1.53 \pm 0.094$  | $1.27 \pm 0.047$  | $0.67 \pm 0.047$  |
| Water flow rate [ml/s] | $0.048 \pm 0.004$ | $0.022 \pm 0.002$ | $0.018 \pm 0.001$ | $0.012 \pm 0.001$ |
